# Supplementary material for: A Dual Fluorescent-Raman Bioorthogonal Probe for Specific Biosynthetic Labeling of Gangliosides
Source: Research Square preprint supplement (doi:10.21203/rs.3.rs-5611903/v1), 2025-05-23
Supplement: Supplementary file 1 [file 45c2dd6d2b39fc90a25e7532.pdf]

# A Dual Fluorescent-Raman Bioorthogonal Probe for Specific Biosynthetic Labeling of Gangliosides

Mana Mohan Mukherjee<sup>1</sup>, Matthew D. Watson<sup>2</sup>, Devin Biesbrock<sup>1</sup>, Lara K. Abramowitz<sup>1</sup>, Steven K. Drake<sup>3</sup>, Jennifer C. Lee<sup>2</sup>, John A. Hanover<sup>1\*</sup>

<sup>1</sup> Laboratory of Cell and Molecular Biology, NIDDK, NIH, Bethesda, MD, USA

<sup>2</sup> Laboratory of Protein Conformation and Dynamics, NHLBI, NIH, Bethesda, MD, USA

<sup>3</sup> Critical Care Medicine Department, Clinical Center, NIH, Bethesda, MD 20892, USA

## Supplementary Figures

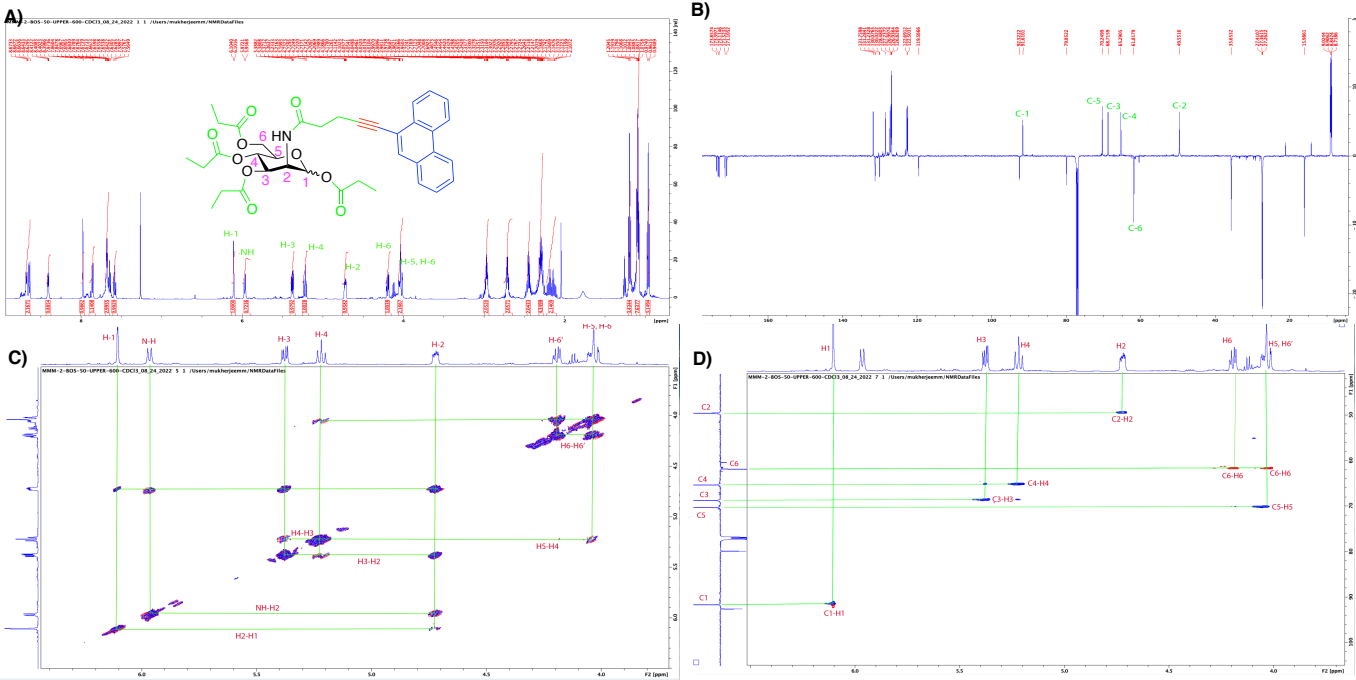

**Supplementary Figure 1.** NMR spectra of the MM-JH-2 β-isomer; (A) <sup>1</sup>H NMR (600 MHz); (B) <sup>13</sup>C NMR (150 MHz); (C) <sup>1</sup>H-<sup>1</sup>H COSY; (D) <sup>1</sup>H-<sup>13</sup>C HSQC.

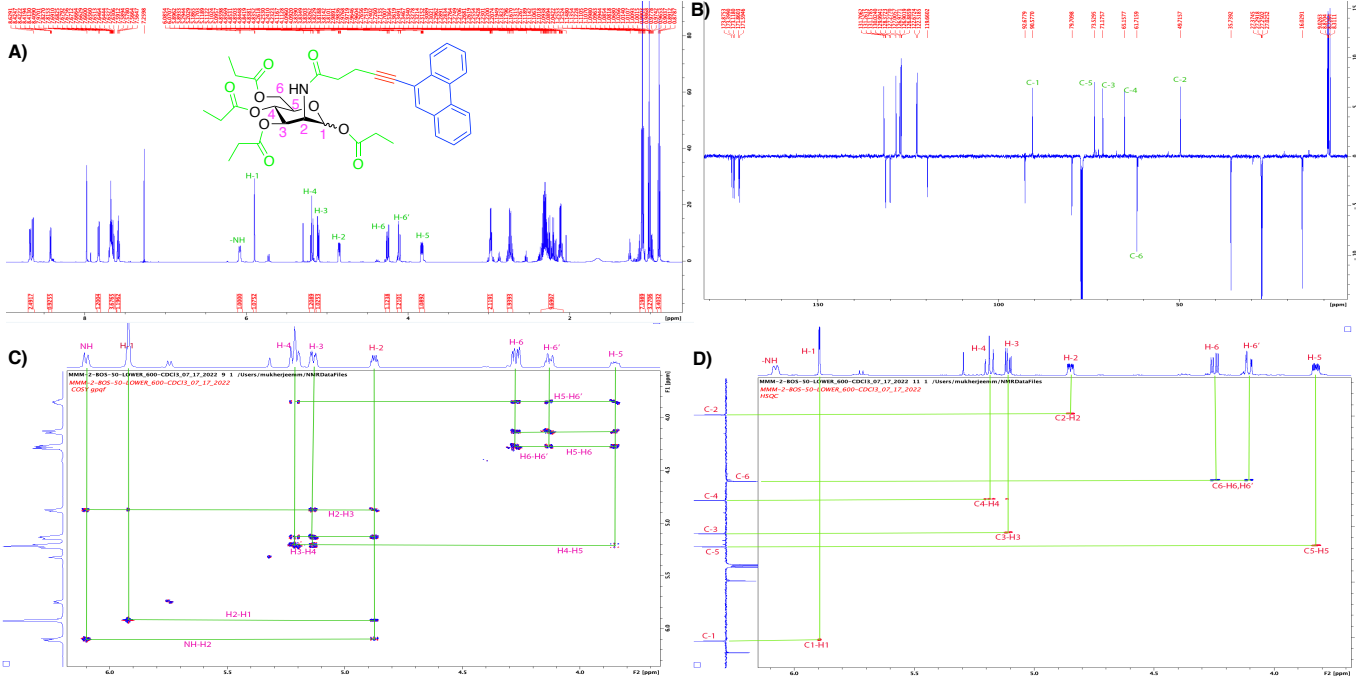

**Supplementary Figure 2.** NMR spectra of the MM-JH-2  $\alpha$ -isomer; (A) <sup>1</sup>H NMR (600 MHz); (B) <sup>13</sup>C NMR (150 MHz); (C) <sup>1</sup>H-<sup>1</sup>H COSY; (D) <sup>1</sup>H-<sup>13</sup>C HSQC.

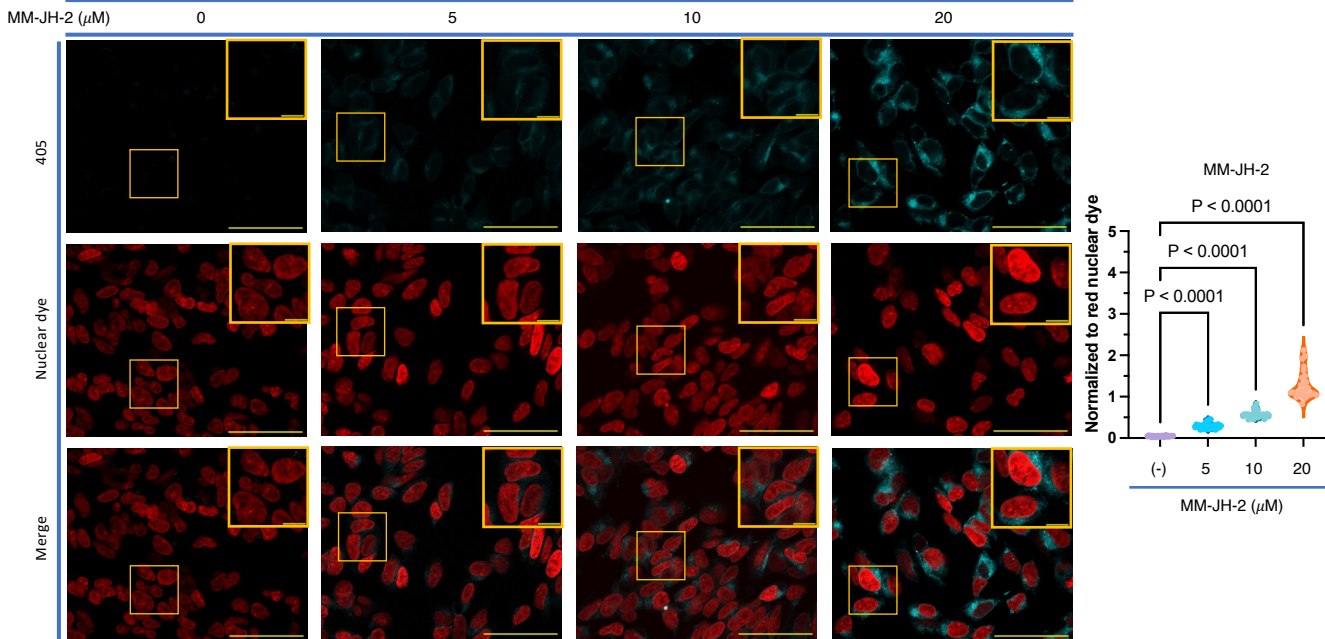

**Supplementary Figure 3.** Concentration dependent incorporation of MM-JH-2 into SH-SY5Y neuroblastoma cells. MM-JH-2 is incorporated into SH-SY5Y cells in a concentration dependent manner, showing detectable labeling from 5 to 20  $\mu\text{M}$  treatment.  $N = 5$  individual biological replicates,  $n = 26$  individual cells chosen for quantification from the confocal images. An ordinary one-way ANOVA test was performed. P-values are shown in the graph and error bars represent the standard deviation centered on the mean. Scale bars are 50  $\mu\text{m}$  and 10  $\mu\text{m}$  for zoomed images. Quantification is shown to the right of the images.



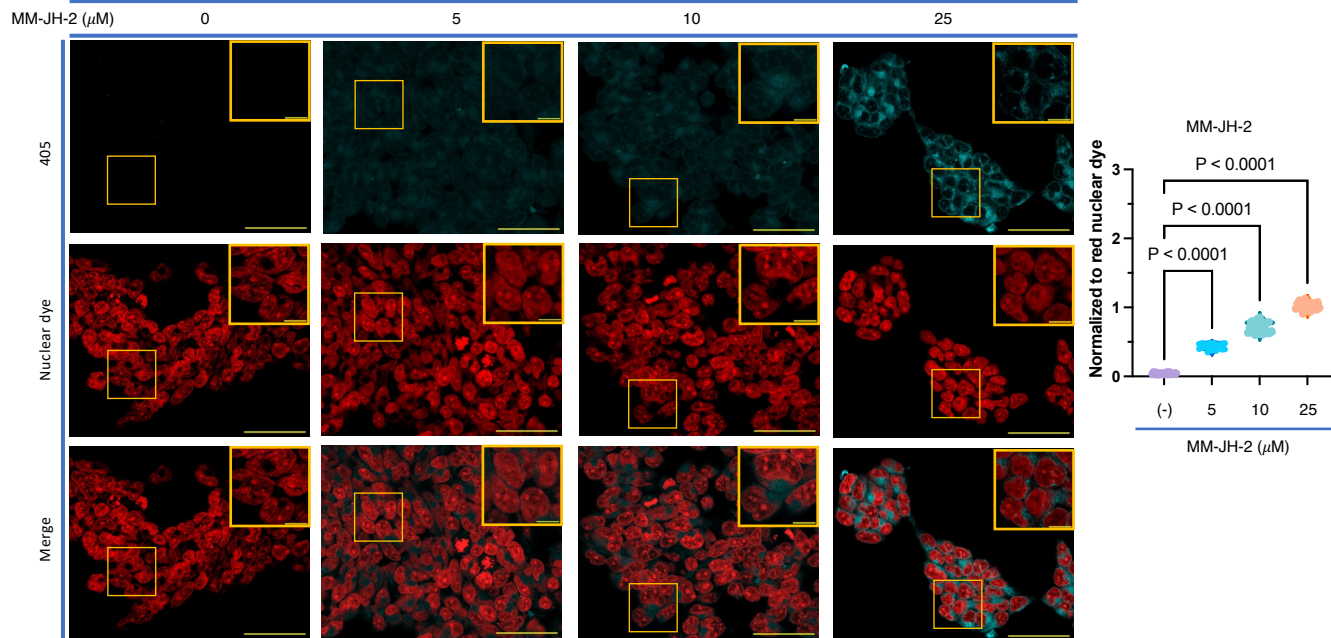

**Supplementary Figure 4.** Concentration dependent incorporation of MM-JH-2 into LA-N-2 neuroblastoma cells. MM-JH-2 is incorporated into LA-N-2 cells in a concentration dependent manner, showing detectable labeling from 5 to 25  $\mu\text{M}$  treatment.  $N = 5$  individual biological replicates,  $n = 26$  individual cells chosen for quantification from the confocal images. An ordinary one-way ANOVA test was performed. P-values are shown in the graph and error bars represent the standard deviation centered on the mean. Scale bars are 50  $\mu\text{m}$  and 10  $\mu\text{m}$  for zoomed images. Quantification is shown to the right of the images.

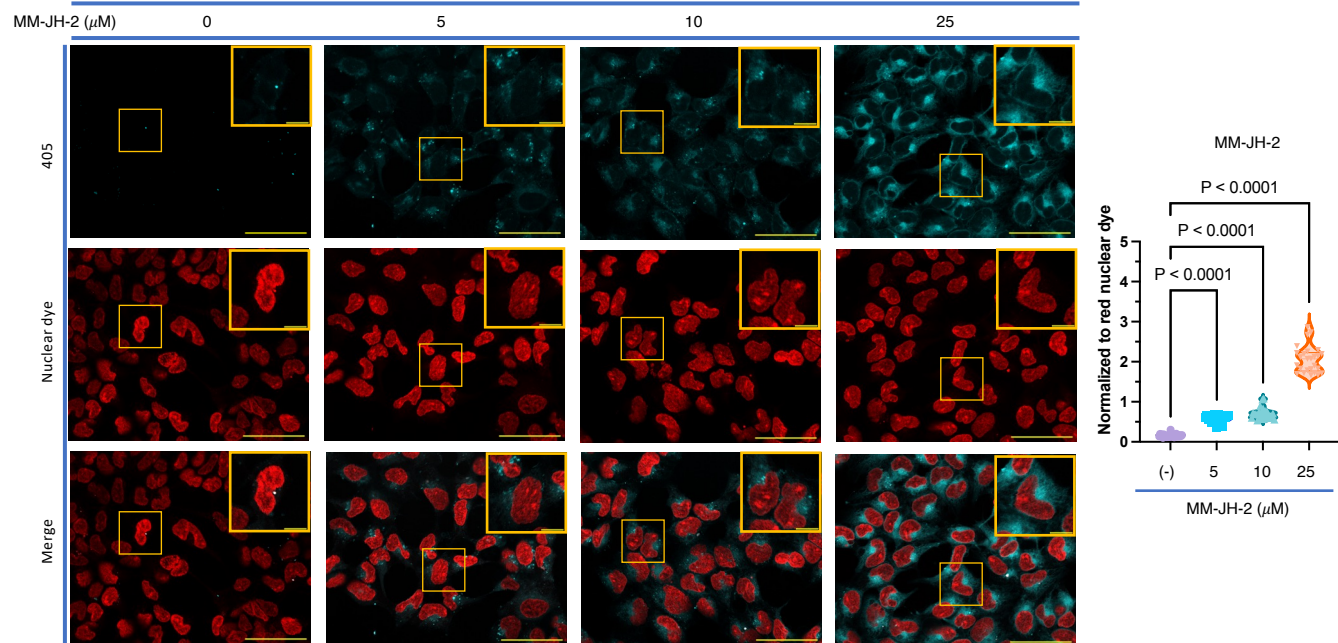

**Supplementary Figure 5.** Concentration dependent incorporation of MM-JH-2 into HEK293T epithelial cells. MM-JH-2 is incorporated into HEK293T cells in a concentration dependent manner, showing detectable labeling from 5 to 25  $\mu\text{M}$  treatment.  $N = 5$  individual biological replicates,  $n = 26$  individual cells chosen for quantification from the confocal images. An ordinary one-way ANOVA test was performed. P-values are shown in the graph and error bars represent the standard deviation centered on the mean. Scale bars are 50  $\mu\text{m}$  and 10  $\mu\text{m}$  for zoomed images. Quantification is shown to the right of the images.

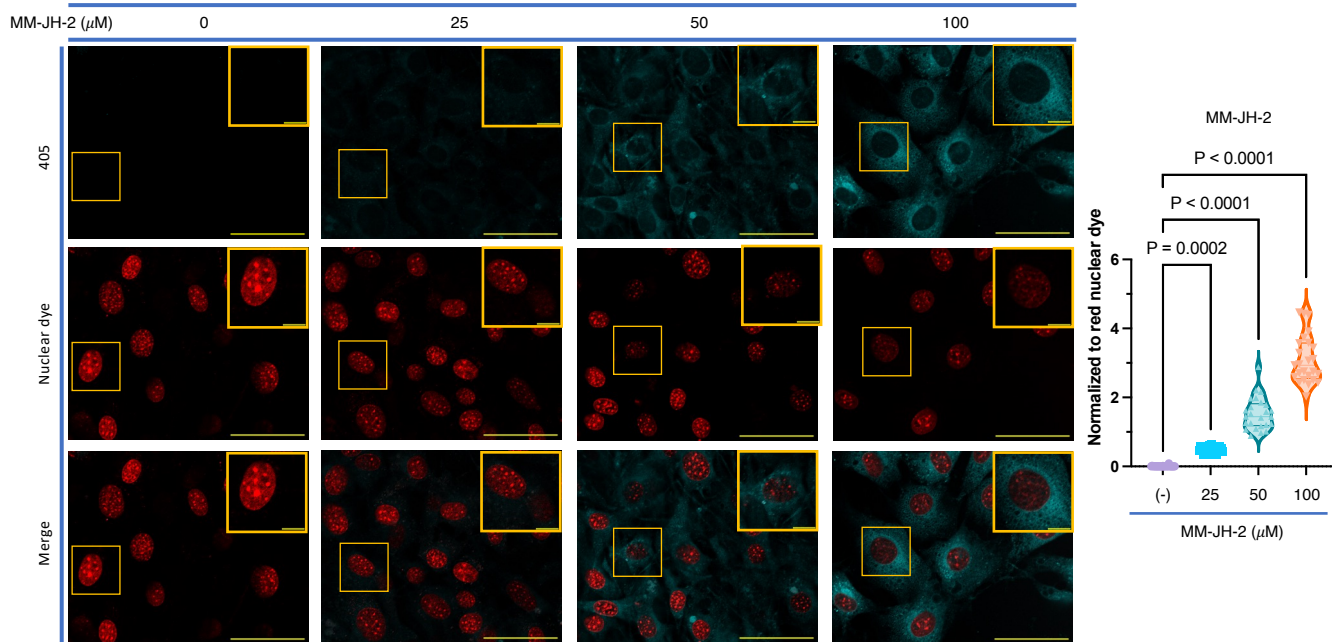

**Supplementary Figure 6.** Concentration dependent incorporation of MM-JH-2 into NIH 3T3 epithelial cells. MM-JH-2 incorporates into NIH 3T3 cells in a concentration dependent manner showing detectable labeling from 50 to 100  $\mu\text{M}$  treatment.  $N = 5$  individual biological replicates,  $n = 25$  individual cells chosen for quantification from the confocal images. An ordinary one-way ANOVA test was performed. P-values are shown in the graph, and the error bars represent the standard deviation with mean as center. Scale bars are 50  $\mu\text{m}$  and 10  $\mu\text{m}$  for zoomed images. Quantification is shown to the right of the images.

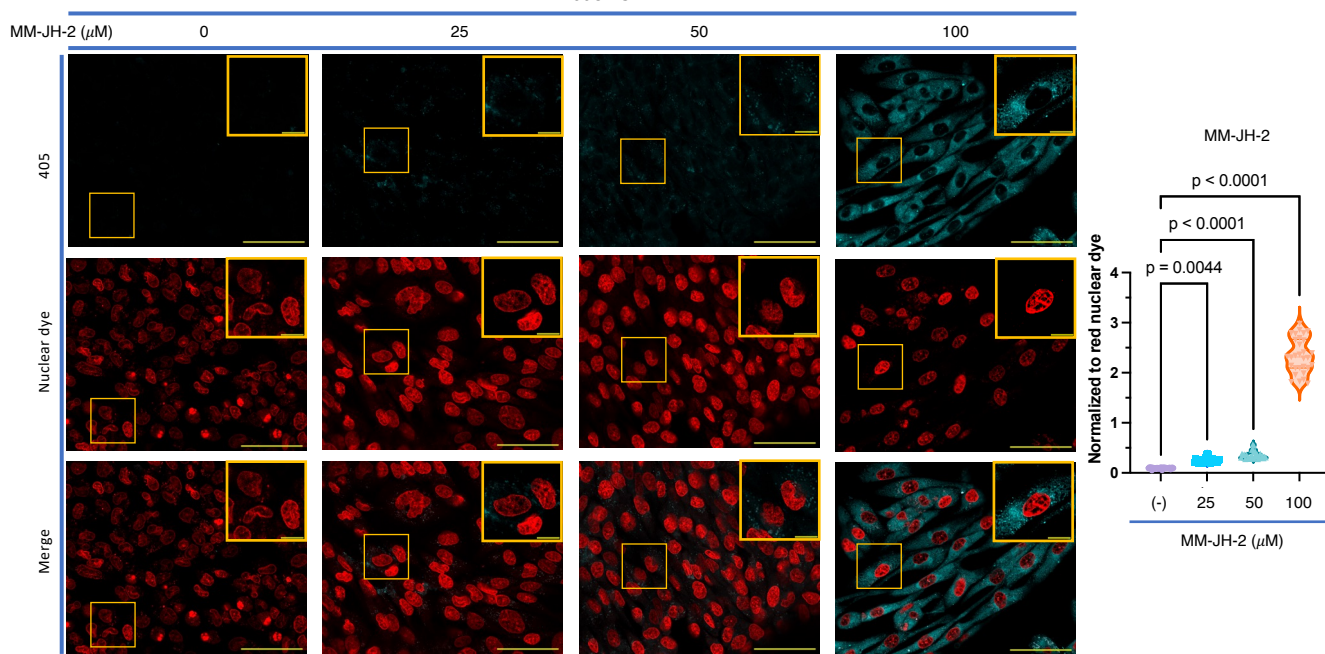

**Supplementary Figure 7.** Concentration dependent incorporation of MM-JH-2 into GnT-I mutated LecCHO epithelial cells. MM-JH-2 is incorporated into LecCHO cells in a concentration dependent manner, showing detectable labeling from 50 to 100  $\mu\text{M}$  treatment.  $N = 5$  individual biological replicates,  $n = 30$  individual cells chosen for quantification from the confocal images. An ordinary one-way ANOVA test was performed. P-values are shown in the graph and error bars represent the standard deviation centered on the mean. Scale bars are 50  $\mu\text{m}$  and 10  $\mu\text{m}$  for zoomed images. Quantification is shown to the right of the images.

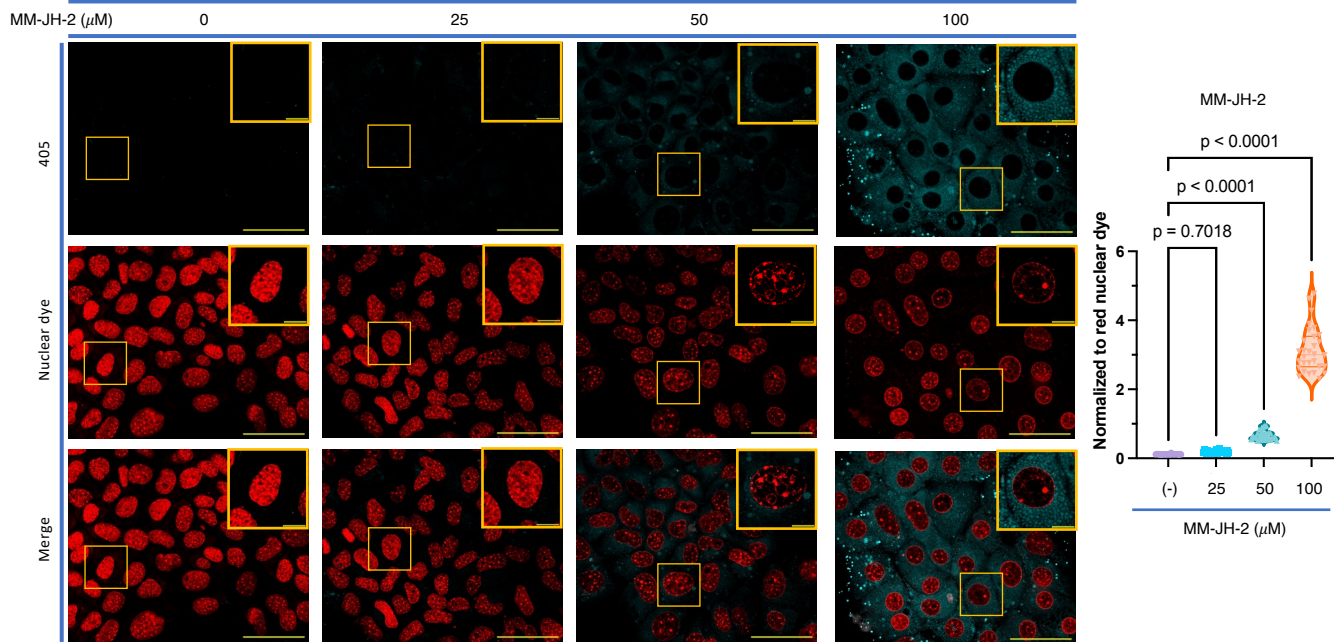

**Supplementary Figure 8.** Concentration dependent incorporation of MM-JH-2 into AML12 mouse hepatocytic cells. MM-JH-2 is incorporated into AML12 cells in a concentration dependent manner, showing detectable labeling from 50 to 100  $\mu\text{M}$  treatment.  $N = 5$  individual biological replicates,  $n = 30$  individual cells chosen for quantification from the confocal images. An ordinary one-way ANOVA test was performed. P-values are shown in the graph and error bars represent the standard deviation centered on the mean. Scale bars are 50  $\mu\text{m}$  and 10  $\mu\text{m}$  for zoomed images. Quantification is shown to the right of the images.



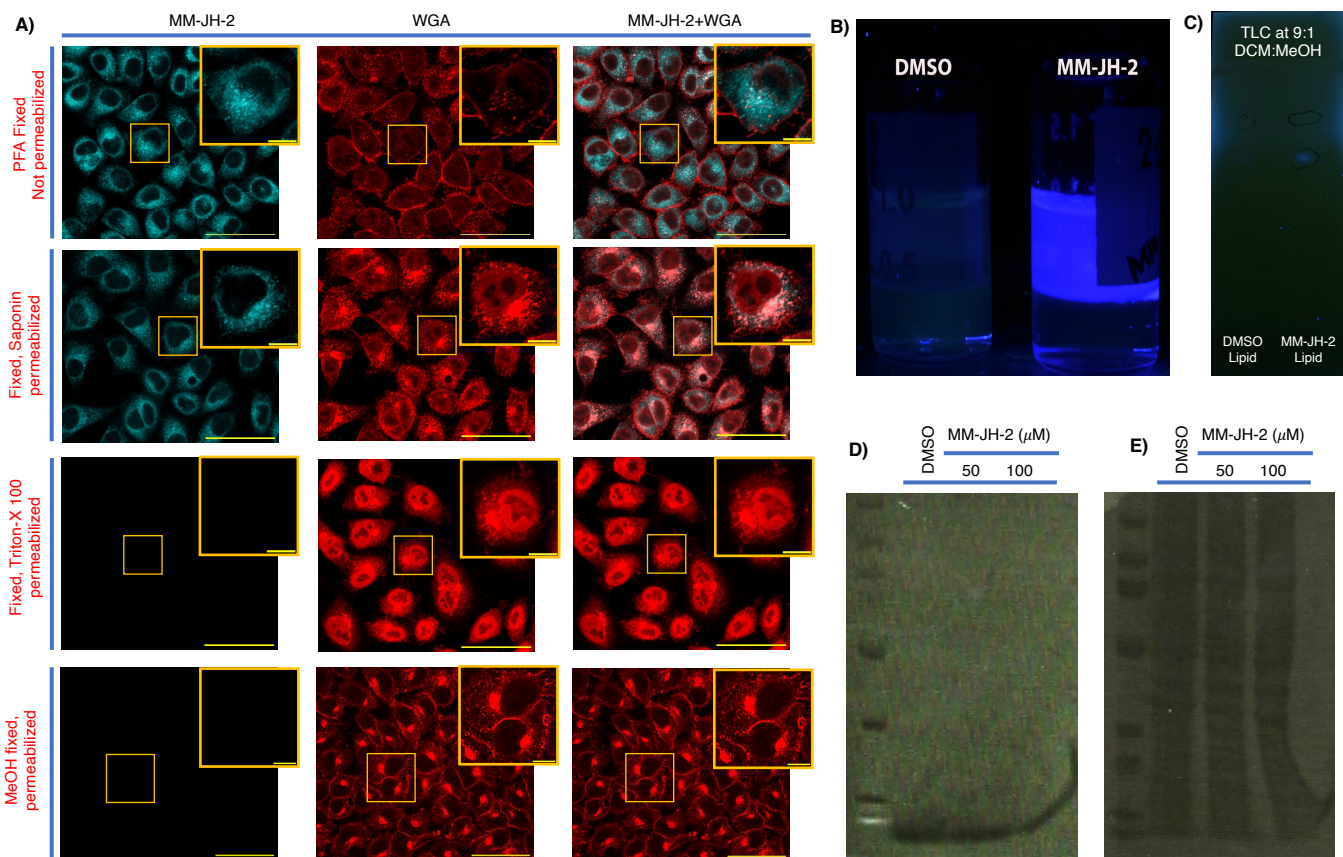

**Supplementary Figure 9.** MM-JH-2 selectively labels lipids in cultured HeLa cells. (A) Effect of permeabilization reagents on MM-JH-2 labeling. The cholesterol-dissolving agent saponin has no effect on MM-JH-2 labeling, but the detergent Triton X-100 and cold methanol completely wash out MM-JH-2 labeled species.  $N = 4$  individual biological replicates. Scale bars are  $50 \mu\text{m}$  and  $10 \mu\text{m}$  for zoomed images. (B) Lipid extracts from DMSO and MM-JH-2 treated HeLa cells under UV light showing blue fluorescence in the MM-JH-2 treated extract.  $N = 5$  individual biological replicates. (C) TLC analysis of lipid extracts from DMSO and MM-JH-2 treated HeLa cells under UV light. (D) HeLa cells were treated with the indicated concentrations of MM-JH-2 for 72 hours and analyzed by in-gel fluorescence scanning. (E) Coomassie blue staining demonstrated equal protein loading.  $N = 3$  individual biological replicates.

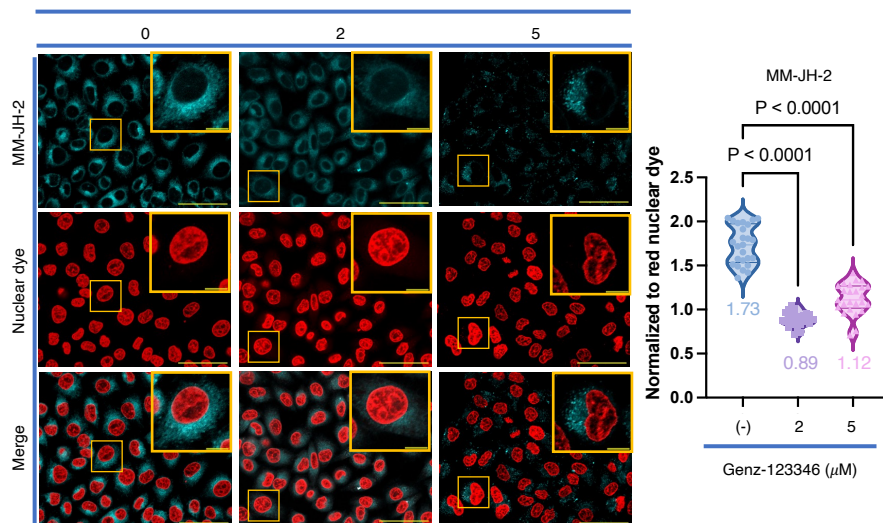

**Supplementary Figure 10.** Glucosylceramide synthase inhibitor Genz-123346 reduces MM-JH-2 labeling in HeLa cells.  $N = 5$  individual biological replicates,  $n = 25$  individual cells chosen for quantification from the confocal images. An ordinary one-way ANOVA test was performed. P-values are shown in the graph and error bars represent the standard deviation centered on the mean. Scale bars are 50  $\mu\text{m}$  and 10  $\mu\text{m}$  for zoomed images. Quantification is shown to the right of the images.

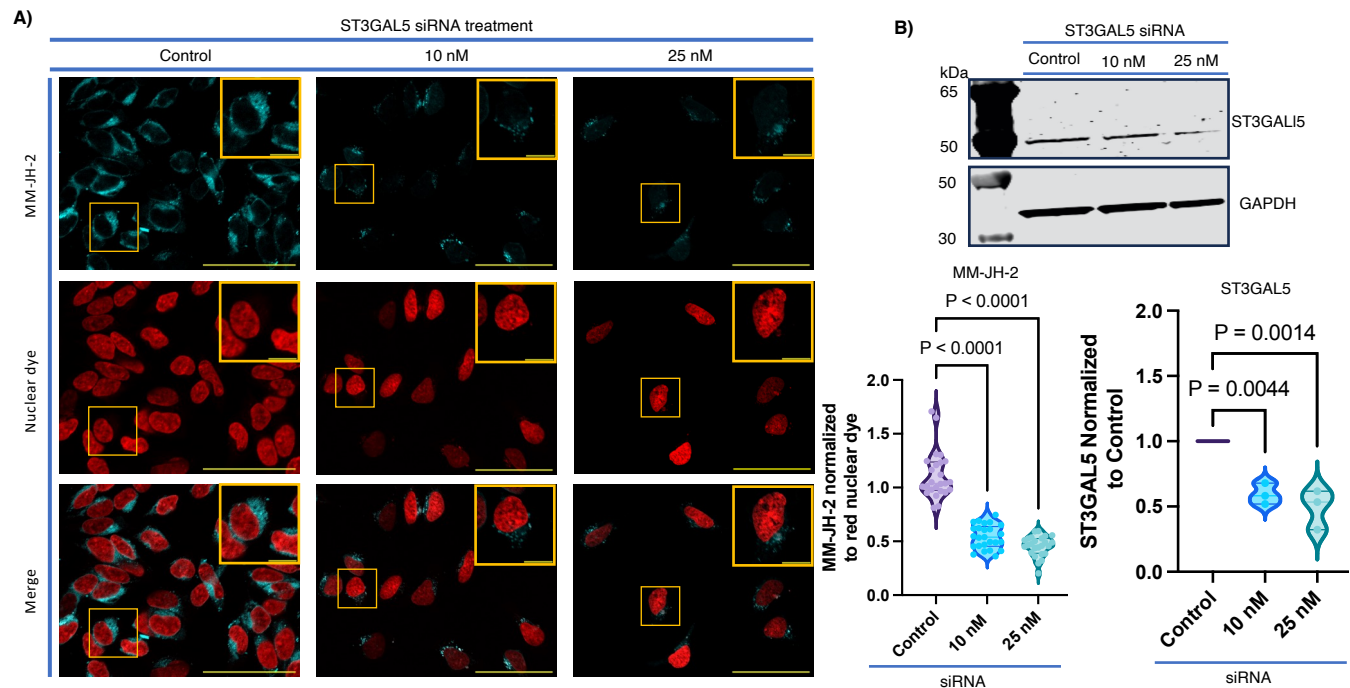

**Supplementary Figure 11.** ST3GAL5 siRNA knockdown reduces MM-JH-2 labeling in SH-SY5Y cells (A) Confocal fluorescence images of SH-SY5Y cells showing that ST3GAL5 knockdown reduces MM-JH-2 labeling.  $N = 3$  individual biological replicates,  $n = 25$  individual cells chosen for quantification from the images. An ordinary one-way ANOVA test was performed. P-values are shown in the graph and error bars represent the standard deviation centered on the mean. Scale bars are  $50\ \mu\text{m}$  and  $10\ \mu\text{m}$  for zoomed images. Quantification is shown to the right of the images. (B) Western blots show ~50% reduction in ST3GAL5 levels in SH-SY5Y cells upon treatment with siRNA against ST3GAL5.  $N = 3$  individual biological replicates. An ordinary one-way ANOVA test was performed. P-values are shown in the graph and error bars represent the standard deviation centered on the mean. Quantification is shown at the lower right corner of the images.



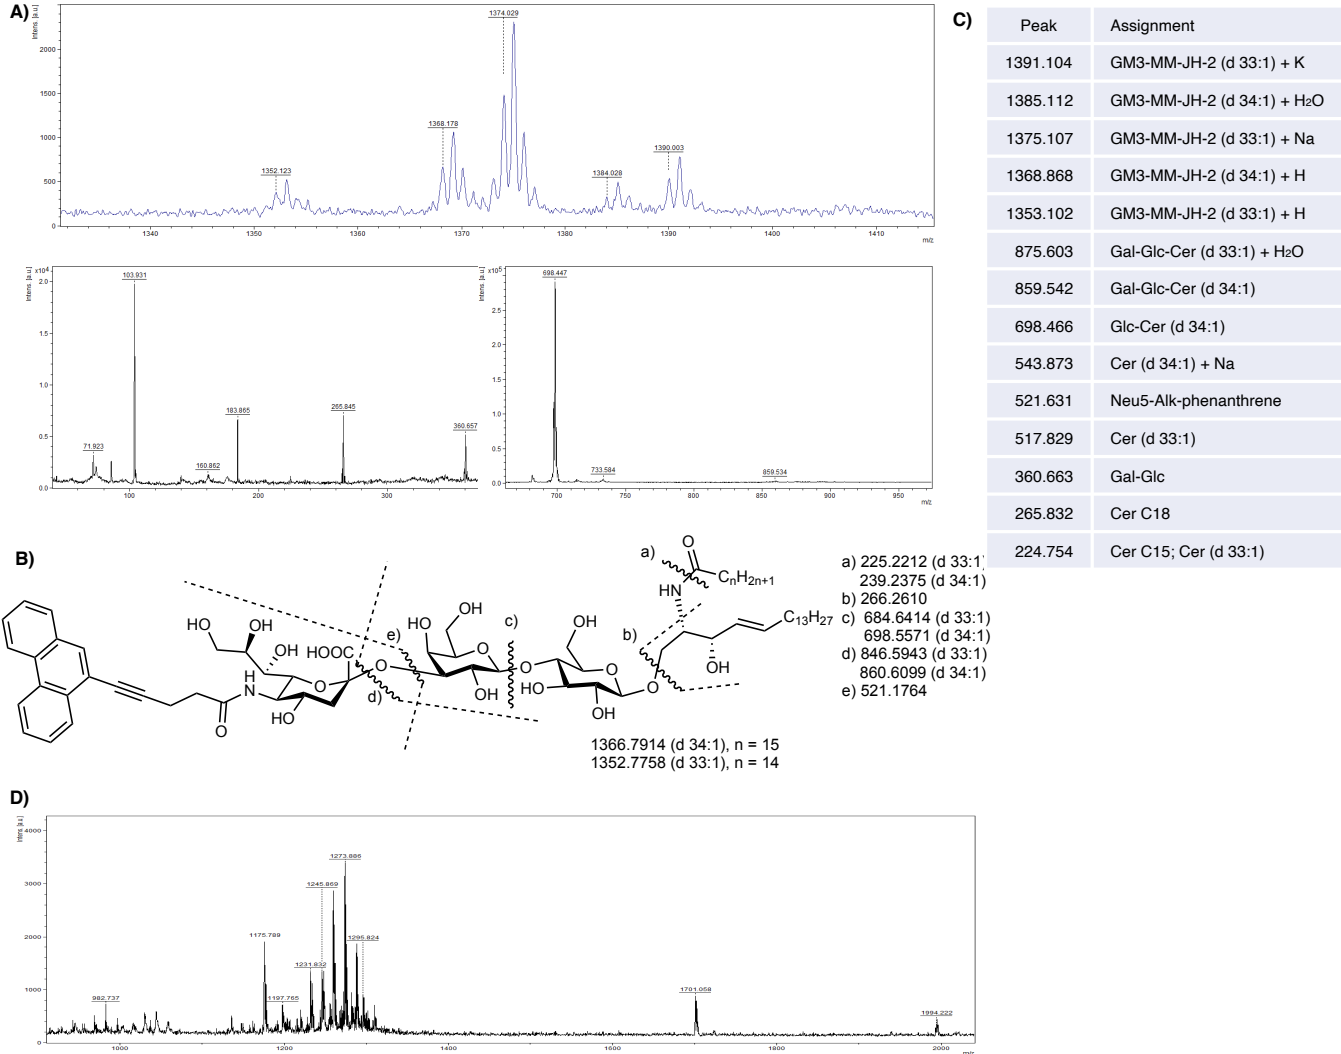

**Supplementary Figure 12.** MALDI mass spectrometric analysis identifies MM-JH-2 modified GM3 gangliosides in lipid extracts. (A) MALDI mass spectrum of a lipid extract from MM-JH-2 treated NIH 3T3 cells. (B) Chemical structure and possible fragmenting position of GM3-MM-JH-2. (C) Peak assignments for possible MALDI mass fragmentations. (D) MALDI mass spectra of a lipid extract from DMSO treated NIH 3T3 cells.  $N = 3$  individual biological replicates.

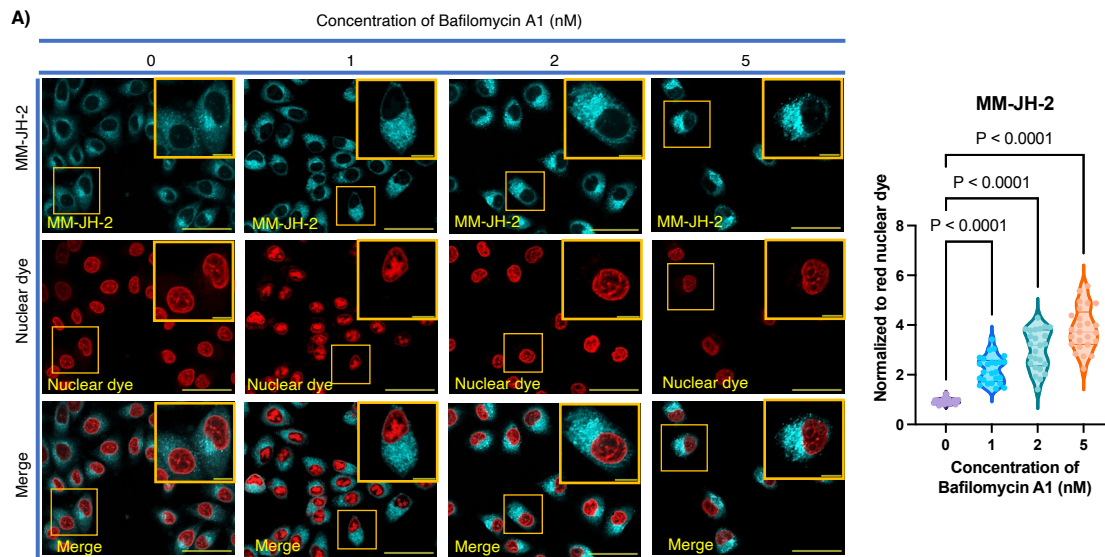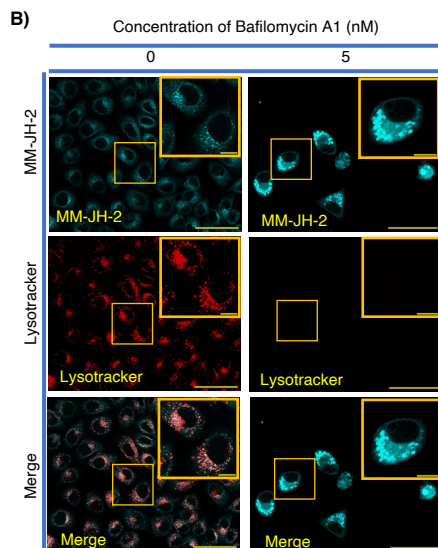

**Supplementary Figure 13.** MM-JH-2 localizes to lysosomes and late endosomes for catabolism. (A) The ATPase inhibitor bafilomycin A1 increased the fluorescence intensity of MM-JH-2 (blue) in lysosomes.  $N = 5$  individual biological replicates,  $n = 25$  individual cells chosen for quantification from the confocal images. An ordinary one-way ANOVA test was performed. P-values are shown in the graph and error bars represent the standard deviation centered on the mean. Scale bars are  $50\ \mu\text{m}$  and  $10\ \mu\text{m}$  for zoomed images. Quantification is shown to the right of the images. (B) Bafilomycin A1 treatment resulted in a reduction of acidity in lysosomes and late endosomes.  $N = 3$  individual biological replicates. Scale bars are  $50\ \mu\text{m}$  and  $10\ \mu\text{m}$  for zoomed images.

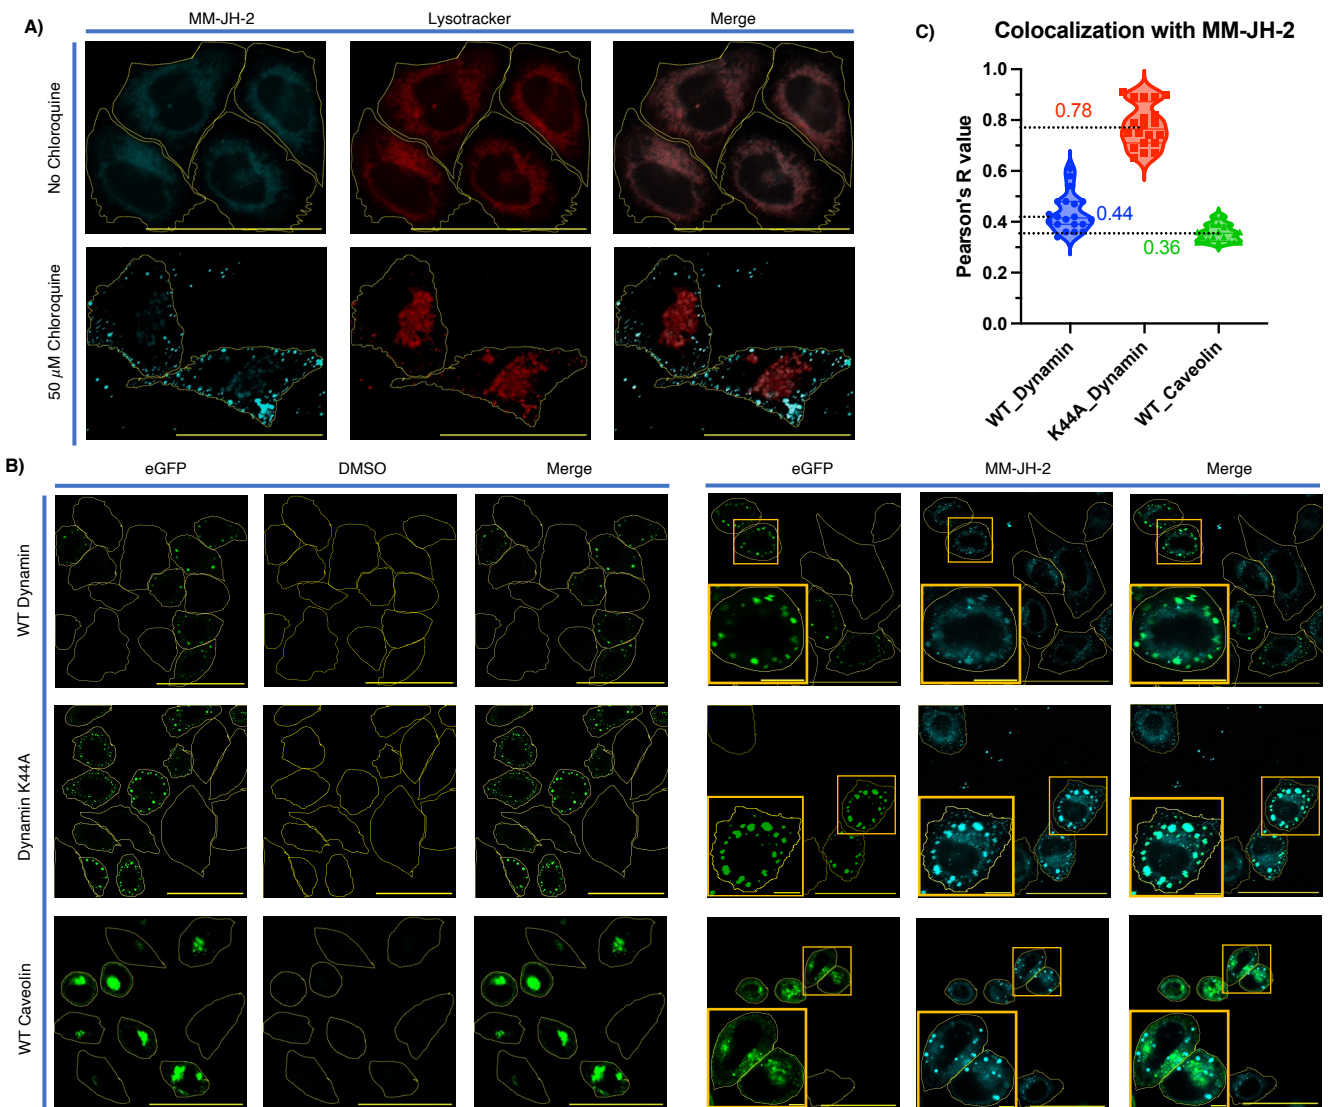

**Supplementary Figure 14.** MM-JH-2 endocytosis depends on both dynamin and caveolin. (A) Confocal images showing that chloroquine treatment blocks MM-JH-2 endocytosis in HeLa cells and results in localization of MM-JH-2 to the plasma membrane.  $N = 3$  individual biological replicates. The scale bar is 50  $\mu$ m. (B) Confocal fluorescence images of HeLa cells transfected with eGFP-dynamin (WT and the K44A mutant) and WT caveolin.  $N = 3$  individual biological replicates. Scale bars are 50  $\mu$ m and 10  $\mu$ m for zoomed images. (C) Colocalization of MM-JH-2 (blue) with eGFP signals. Colocalization was quantified by mean Pearson's R value.  $N = 4$  individual biological replicates,  $n = 20$  individual cells chosen for Pearson's R value analysis from the confocal images. Error bars represent the standard deviation centered on the mean.

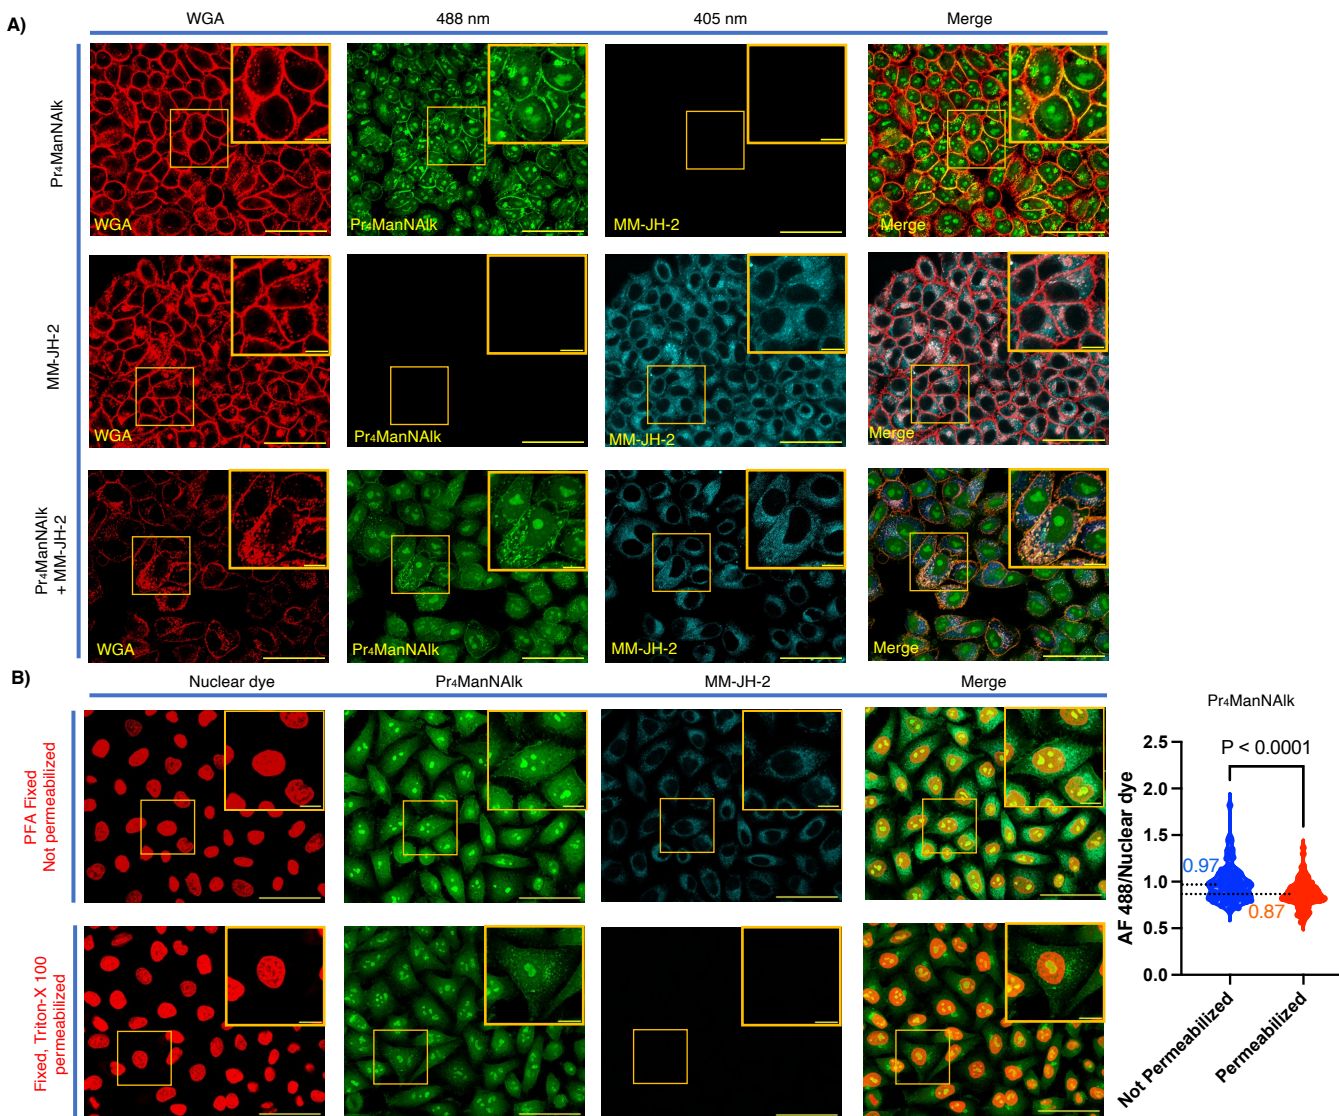

**Supplementary Figure 15.** Confocal imaging of HeLa cells treated with MM-JH-2 and Pr<sub>4</sub>ManNAik. (A) These two MOEs label HeLa cells differentially and only superimpose in intracellular structures, but not on the PM nor in the nucleus. MM-JH-2 labeling was present in intracellular structures but not on the cell surface. Pr<sub>4</sub>ManNAik was distributed predominantly on the PM with some nonspecific labeling of the nucleolus.  $N = 5$  individual biological replicates. (B) Approximately 10% of the total Pr<sub>4</sub>ManNAik signal is associated with glycolipid labeling.  $N = 5$  individual biological replicates,  $n = 100$  individual cells chosen for quantification from the confocal images. A two-sided unpaired *t*-test was performed. Quantification is shown to the right of the images. P-values are shown in the graph and error bars represent the standard deviation centered on the mean. Scale bars are 50  $\mu\text{m}$  and 10  $\mu\text{m}$  for zoomed images.

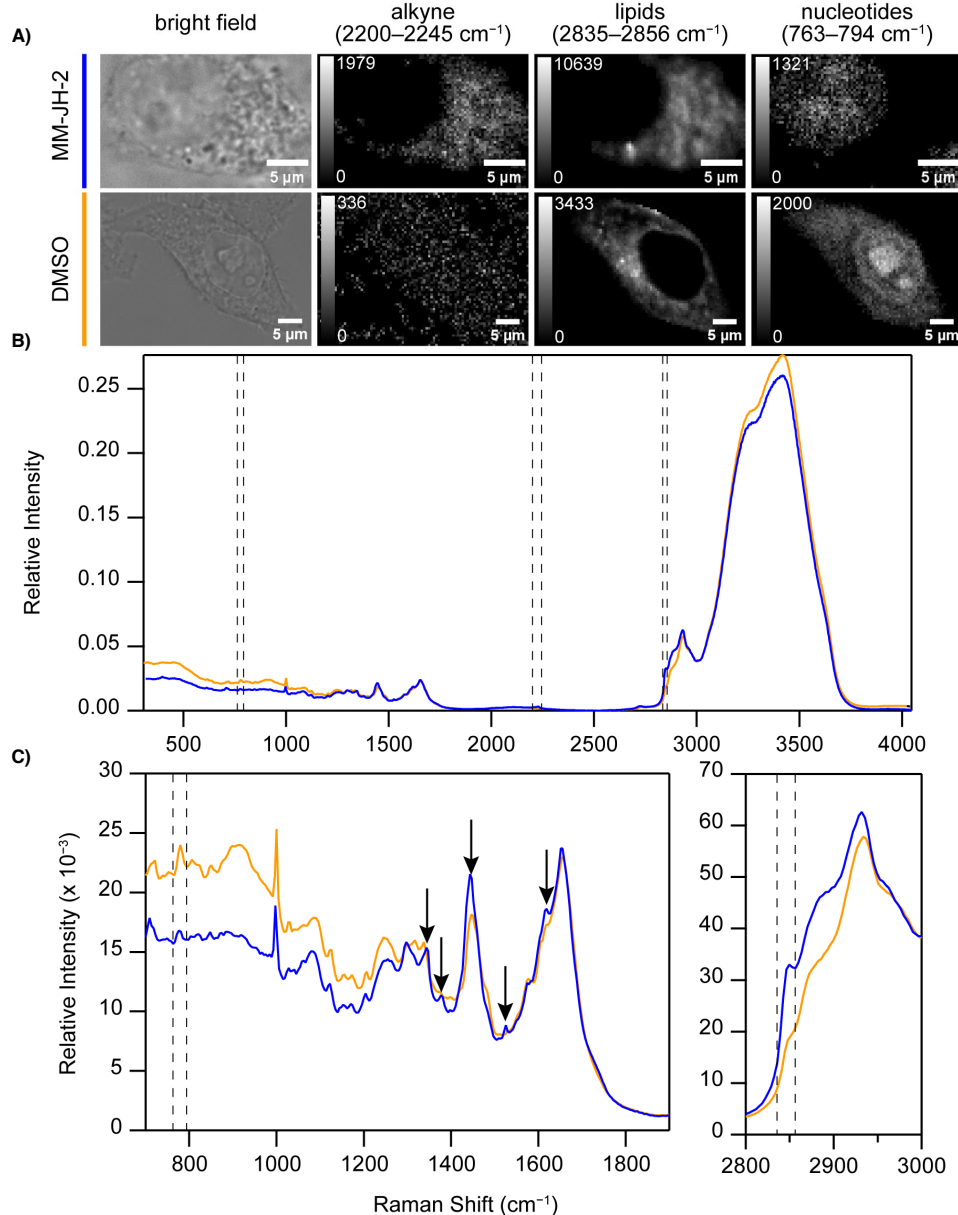

**Supplementary Figure 16.** Raman spectral imaging of HeLa cells treated with MM-JH-2. (A) Raman maps of the cells used to generate the averaged spectra shown in (B) and (C) as well as Fig. 4B. (B) Full spectral window of the averaged whole-cell Raman spectra shown in Fig. 4B showing the spectral regions used to generate maps of nucleotides, MM-JH-2, and lipids (dashed lines). (C) Detail of the fingerprint (left) and C–H stretching (right) regions of the Raman spectrum. Additional spectral features of MM-JH-2 in the fingerprint region are indicated by arrows.



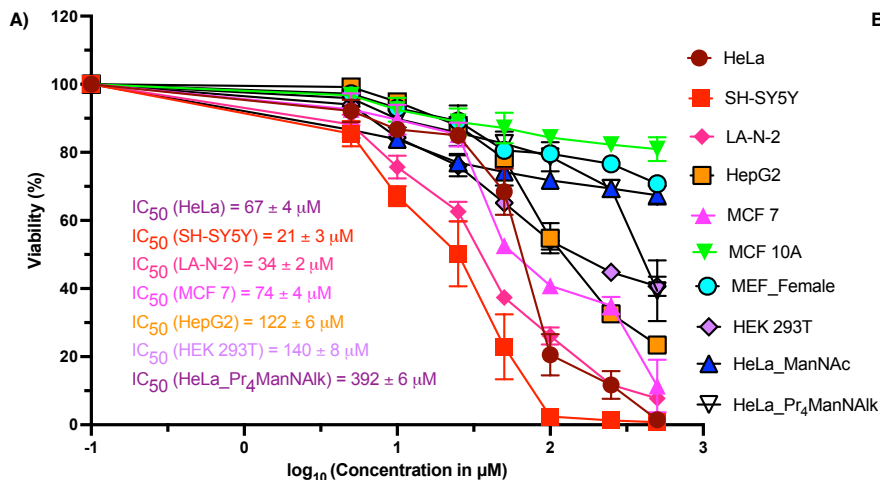

**B)**

| Cell Line    | IC <sub>50</sub> ( $\mu\text{M}$ ) | Concentrations ( $\mu\text{M}$ ) used in the study |
|--------------|------------------------------------|----------------------------------------------------|
| HeLa         | $67 \pm 4$                         | 10-50                                              |
| SH-SY 5Y     | $21 \pm 3$                         | 5-20                                               |
| LA-N-2       | $34 \pm 2$                         | 5-25                                               |
| HepG2        | $122 \pm 6$                        | --                                                 |
| MCF 7        | $74 \pm 8$                         | 5-25                                               |
| MCF 10A      | ND                                 | 25-100                                             |
| MEF (Female) | ND                                 | --                                                 |
| HEK 293T     | $140 \pm 8$                        | 5-25                                               |

**Supplementary Figure 17.** MM-JH-2 selectively eradicates cancer cells over nonmalignant cells. (A) MTT assays of various cell lines treated with MM-JH-2 (5 to 500  $\mu\text{M}$ ) show that only malignant cells (HeLa, MCF7, SH-SY5Y, LA-N-2, HepG2) are eradicated by the treatment, whereas no considerable cytotoxicity was observed for nonmalignant cell lines (MEF, MCF10A) up to 500  $\mu\text{M}$  treatment. ND indicates no detection up to 500  $\mu\text{M}$  MM-JH-2 treatment.  $N = 6$  individual biological replicates. Error bars represent the standard deviation centered on the mean. (B) Table of  $\text{IC}_{50}$  values for MM-JH-2 in the cell lines used in this study.

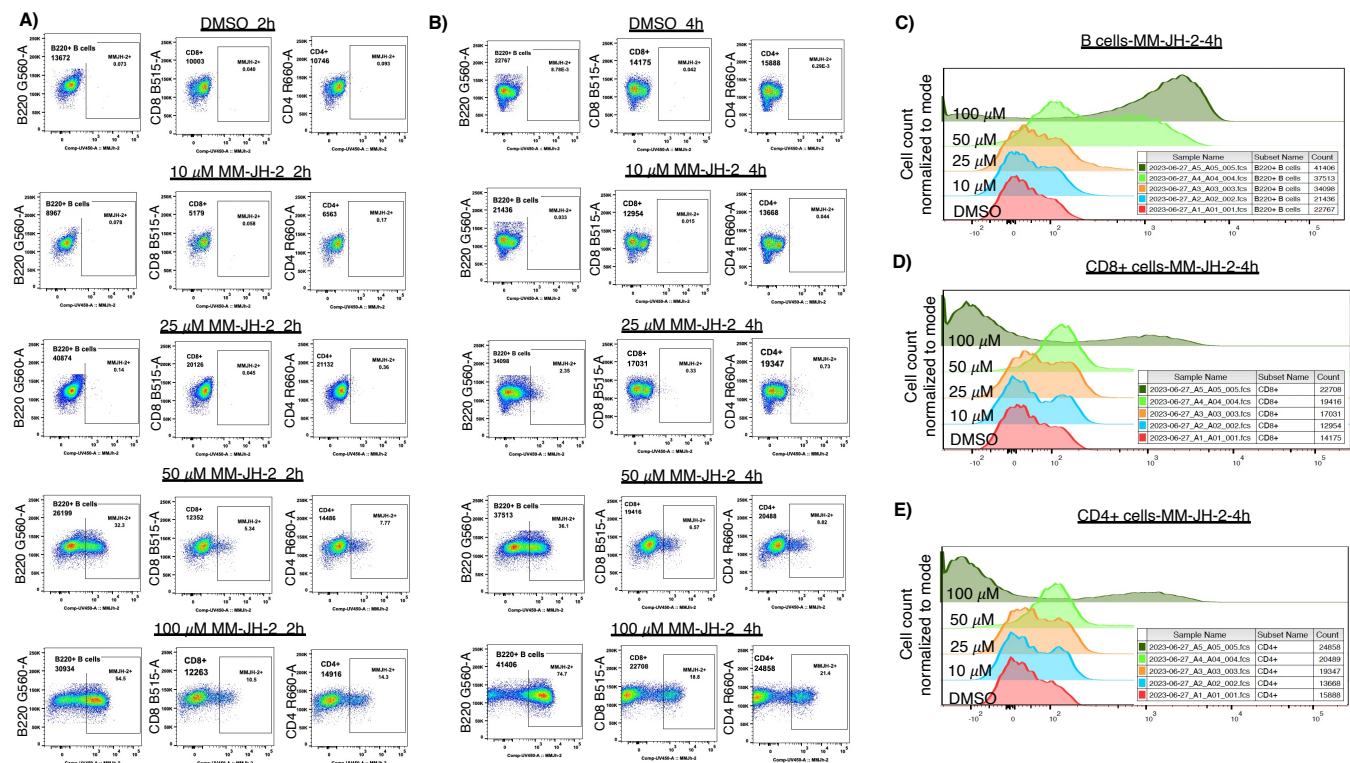

**Supplementary Figure 18.** MM-JH-2 can selectively label B cells over T cells in a coculture of splenocytes. Histograms of splenocyte cell populations after (A) 2 hours and (B) 4 hours of treatment with MM-JH-2. Histograms showing the change in (C) B220<sup>+</sup>-cell, (D) CD4<sup>+</sup>-cell, and (E) CD8<sup>+</sup>-cell populations after treatment with MM-JH-2 for 4 hours.  $N = 6$  individual biological replicates.
